# Supplementary material
Source: publisher figshare collection journal article supplement (https://tandf.figshare.com/ndownloader/files/13507475)
Supplement: Supplementary file 1 [file 13507475]

**Supplementary information to ”Characteristics of particle emissions and their atmospheric dilution during co-combustion of coal and wood pellets in a large combined heat and power plant”, Mylläri et al.**

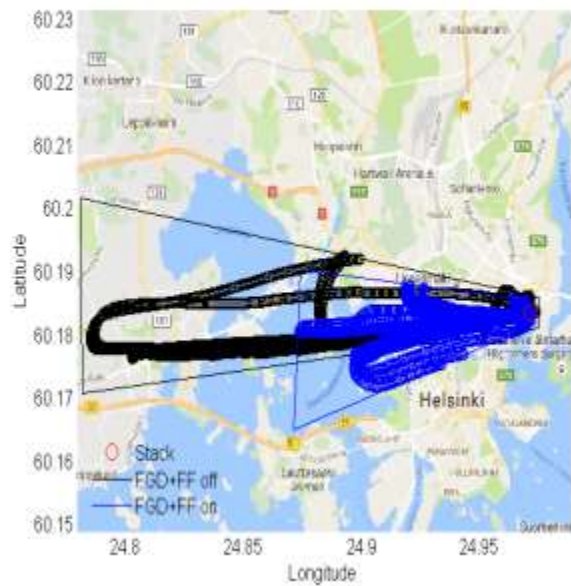

Figure SI1 Helicopter flight coordinates at map showing flight paths and data points taken into account. Blue colour represents “FGD+FF on” situation whereas black colour represents “FGD+FF off” situation.

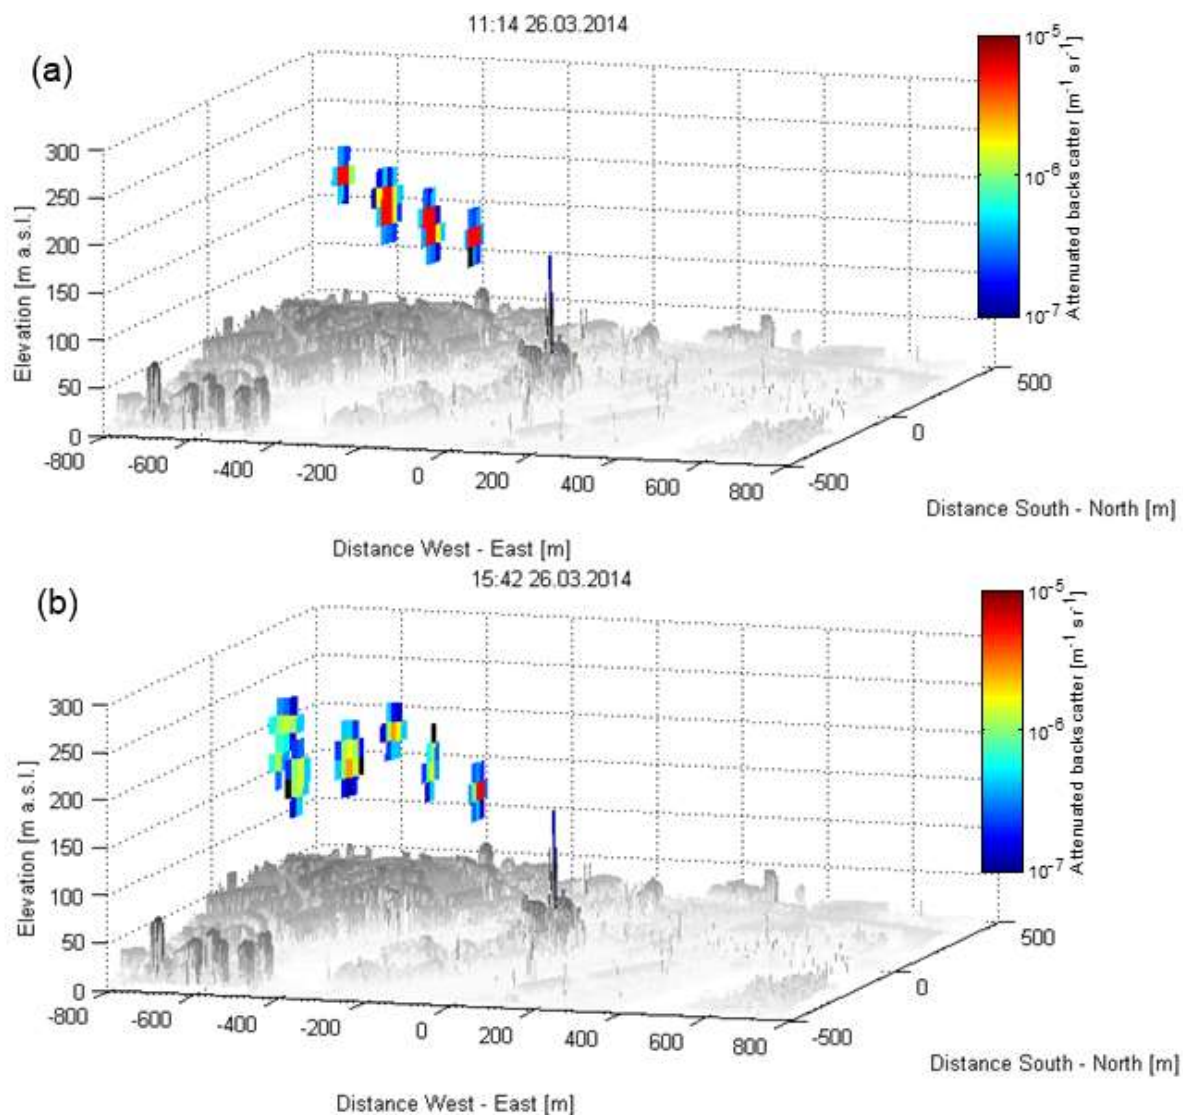

Figure SI2 Lidar data from the measurement day, the stack is in the middle. (a) has been measured during the “FGD+FF on” and (b) during “FGD+FF off”. The sea is on the right hand side. Colour represents the attenuated backscatter ( $\text{m}^{-1} \text{s}^{-1}$ )

Table SI1  $\text{CO}_2$ ,  $\text{SO}_2$ ,  $\text{NO}_x$ ,  $\text{N}_{\text{tot}}$  and dust concentrations in ( $\text{mg Nm}^{-3}$  or  $\text{m}^{-3}$ ) reduced to 6%  $\text{O}_2$

|                                                | <i>coal + 10.5 % pellet</i><br><i>FGD+FF off</i> | <i>coal + 10.5 % pellet</i><br><i>FGD+FF on</i> | <i>coal</i><br><i>FGD+FF off</i> | <i>coal FGD+FF on</i> |
|------------------------------------------------|--------------------------------------------------|-------------------------------------------------|----------------------------------|-----------------------|
| $\text{CO}_2$ ( $\text{mg Nm}^{-3}$ )          | 206 318                                          | 200 892                                         | 196 894                          | 203 745               |
| $\text{SO}_2$ ( $\text{mg Nm}^{-3}$ )          | 727                                              | 170                                             | 701                              | 159                   |
| $\text{NO}_x$ ( $\text{mg Nm}^{-3}$ )          | 347                                              | 346                                             | 341                              | 348                   |
| $\text{O}_2$ (%)                               | 6.0                                              | 6.0                                             | 6.0                              | 6.0                   |
| $\text{N}_{>2.5\text{nm}}$ ( $\text{m}^{-3}$ ) | $7.35 \times 10^{11}$                            | $3.52 \times 10^8$                              | $1.82 \times 10^{13}$            | $4.23 \times 10^8$    |
| Dust ( $\text{mg Nm}^{-3}$ )                   | 109                                              | 5                                               | 190                              | 4                     |

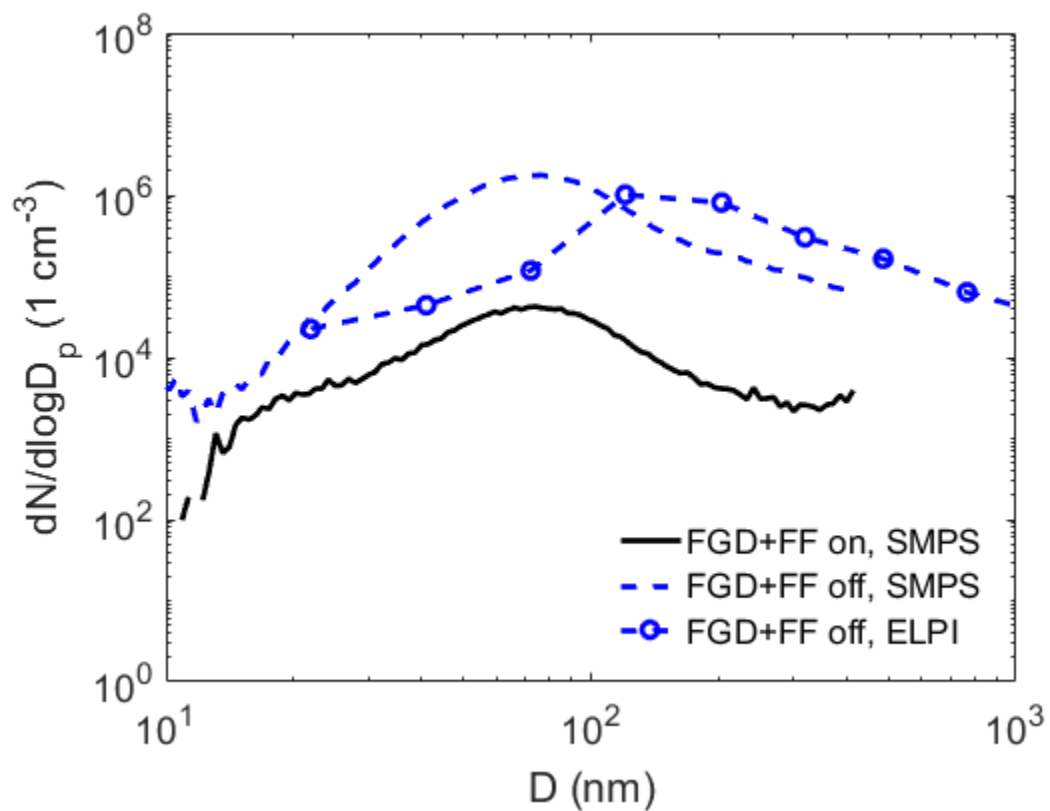

Figure SI3 Non-volatile particle number size distribution calculated based on both the SMPS and the ELPI instrument data for the mixture of coal and industrial pellets.

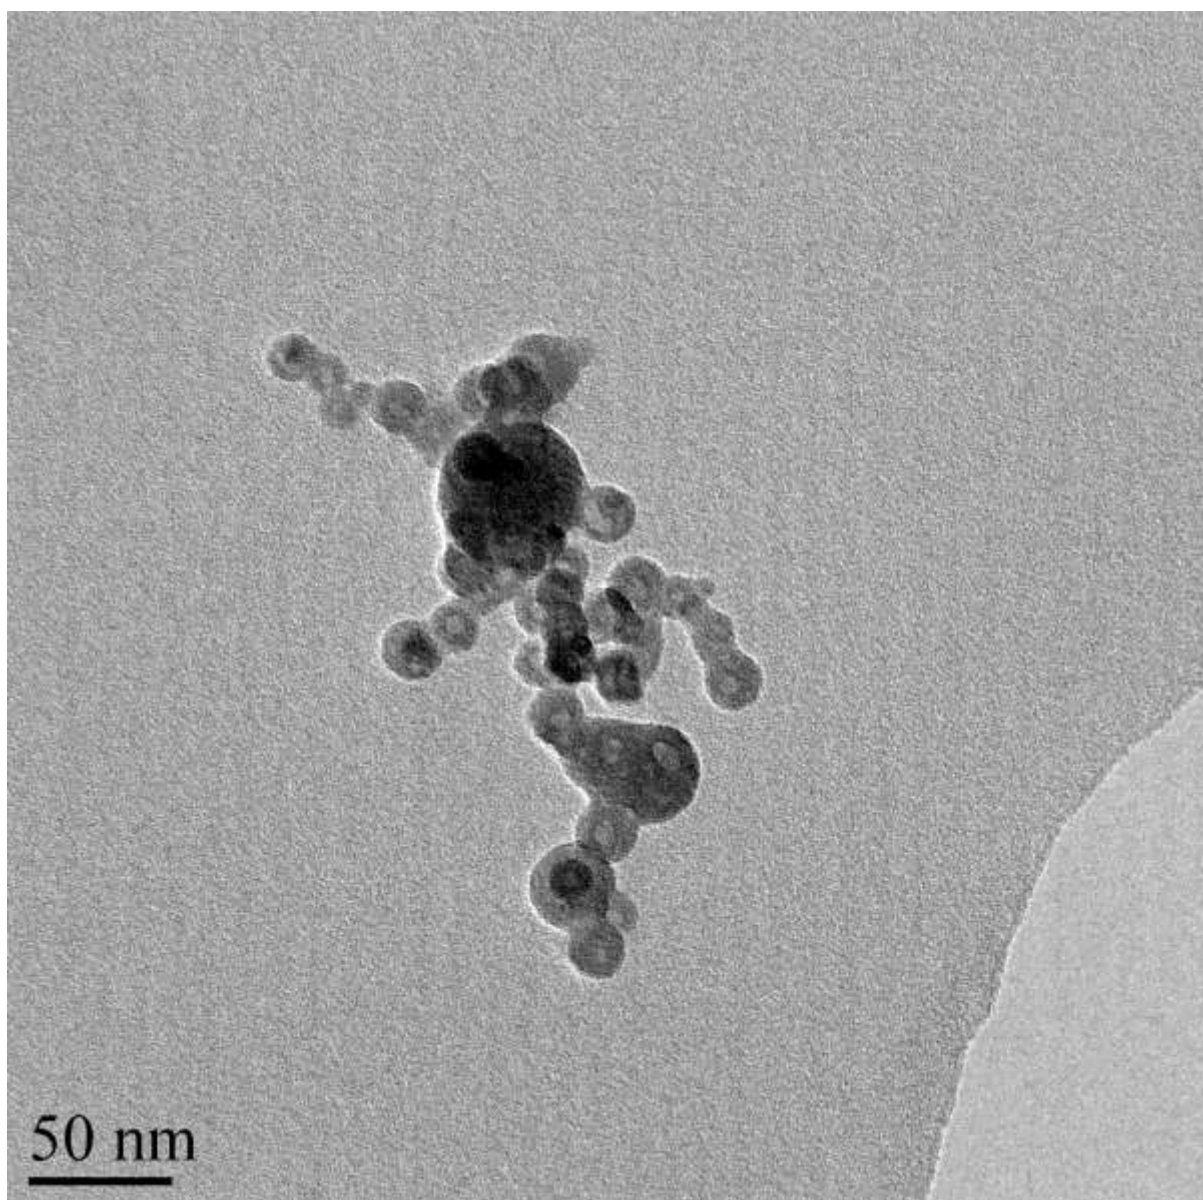

Figure SI4 Larger image of Figure 2 (c) (top row right side) primary particle agglomerate

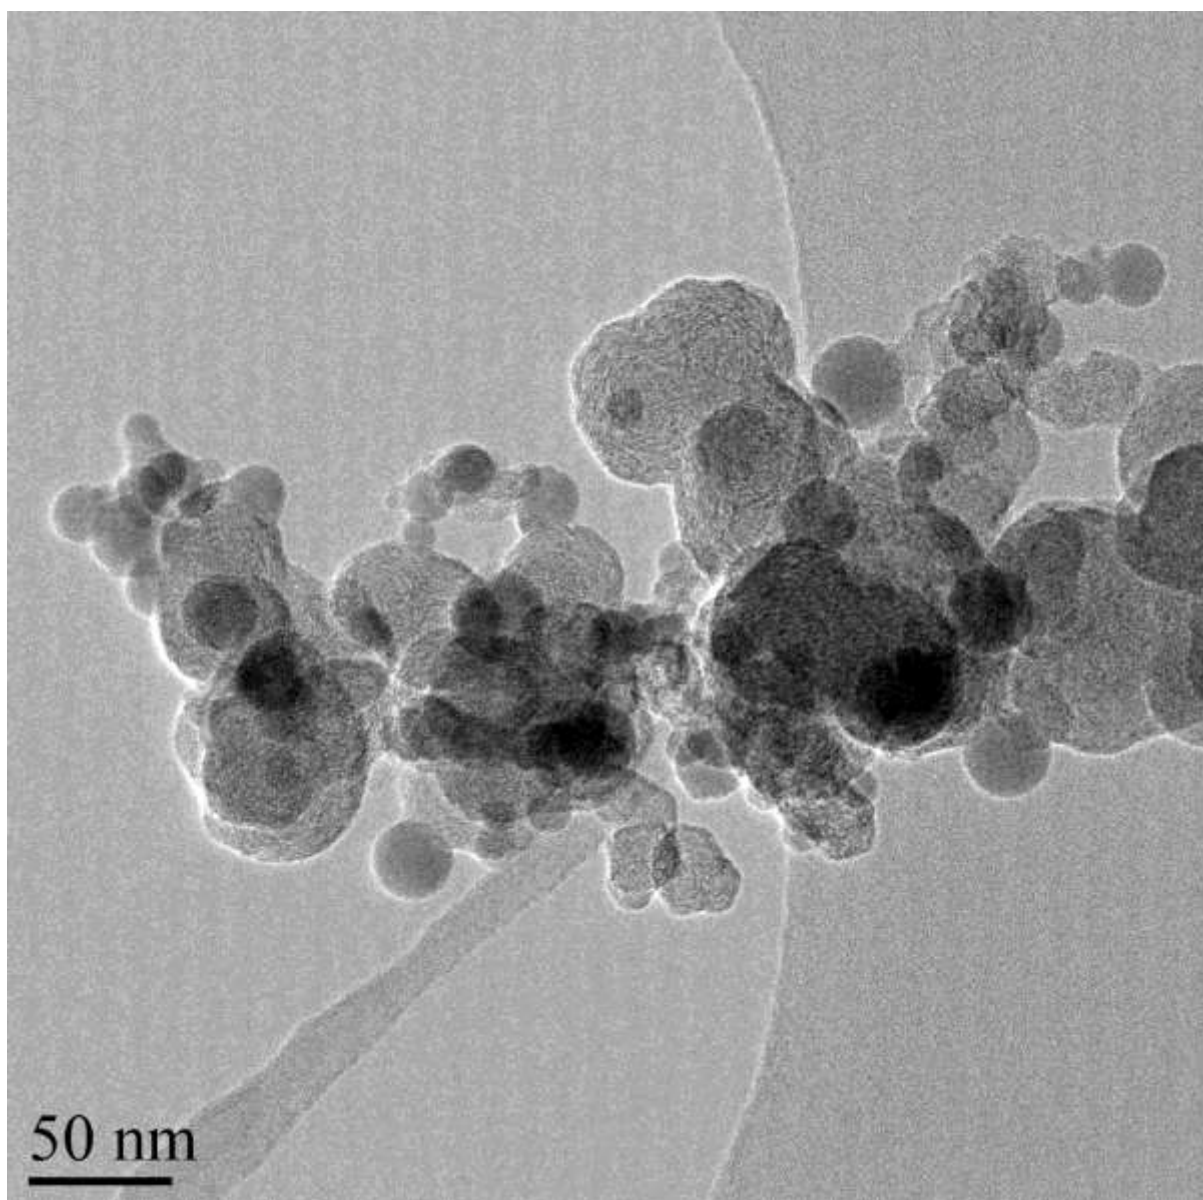

Figure SI5 Magnification of Figure 2 (c) (lower row left side) soot agglomerate
